RETRACTION

# Retraction: Exploratory algorithms to devise multi-epitope subunit vaccine by examining HIV-1 envelope glycoprotein: An immunoinformatics and viroinformatics approach

The *PLOS One* Editors

The *PLOS One* Editors retract this article [1] due to concerns about peer review integrity, authorship, and potential manipulation of the publication process. These concerns call into question the validity of the reported results. We regret that the issues were not identified prior to the article's publication.

All authors did not agree with the retraction.

## Reference

1. Mishra SK, Senathilake KS, Kumar N, Patel CN, Uddin MB, Alqahtani T, et al. Exploratory algorithms to devise multi-epitope subunit vaccine by examining HIV-1 envelope glycoprotein: An immunoinformatics and viroinformatics approach. *PLoS One*. 2025;20(2): e0318523. <https://doi.org/10.1371/journal.pone.0318523> PMID: [40014623](https://pubmed.ncbi.nlm.nih.gov/40014623/)

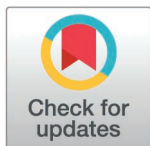

## OPEN ACCESS

**Citation:** The *PLOS One* Editors (2025) Retraction: Exploratory algorithms to devise multi-epitope subunit vaccine by examining HIV-1 envelope glycoprotein: An immunoinformatics and viroinformatics approach. *PLoS One* 20(5): e0324076. <https://doi.org/10.1371/journal.pone.0324076>

**Published:** May 6, 2025

**Copyright:** © 2025 The *PLOS One* Editors. This is an open access article distributed under the terms of the [Creative Commons Attribution License](https://creativecommons.org/licenses/by/4.0/), which permits unrestricted use, distribution, and reproduction in any medium, provided the original author and source are credited.
